# Supplementary material for: The Incorporation of Marine Coral Microparticles into Collagen-Based Scaffolds Promotes Osteogenesis of Human Mesenchymal Stromal Cells via Calcium Ion Signalling
Source: MDPI journal article supplement (doi:10.3390/md18020074), 2020-01-23
Supplement: s1 [file s1]

## Supplementary data

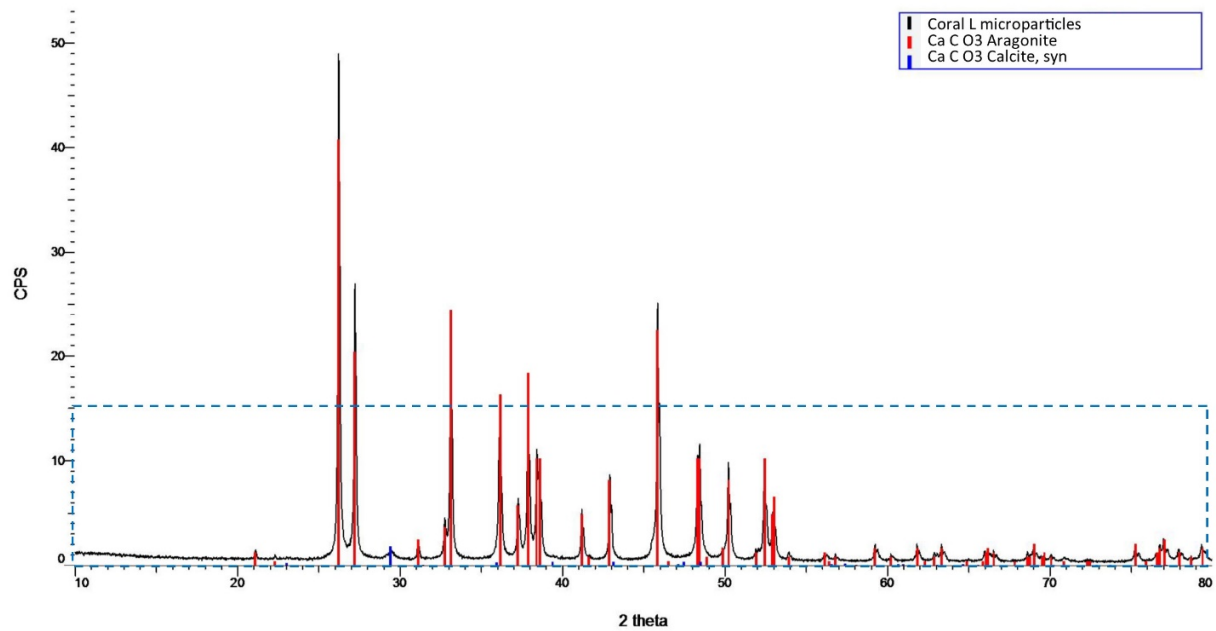

**Supplementary Figure S1.** XRD analysis of coral L microparticles. Blue dashed box indicates the region presented in Figure 2a. Control spectra were obtained from the International Centre for Diffraction Data (ICDD); CaCO<sub>3</sub> Aragonite – PDF 00-041-1475 (ICDD, 2019), CaCO<sub>3</sub> Calcite, syn – PDF 00-005-0586 (ICDD, 2019). CPS indicates counts per second.

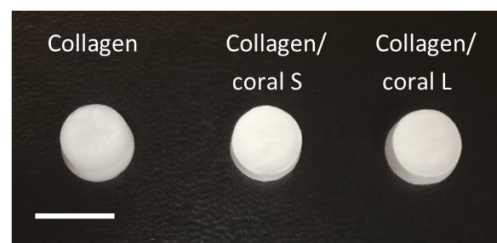

**Supplementary Figure S2.** Macroscopic images of cylindrical scaffolds. Scale bar – 10 mm.

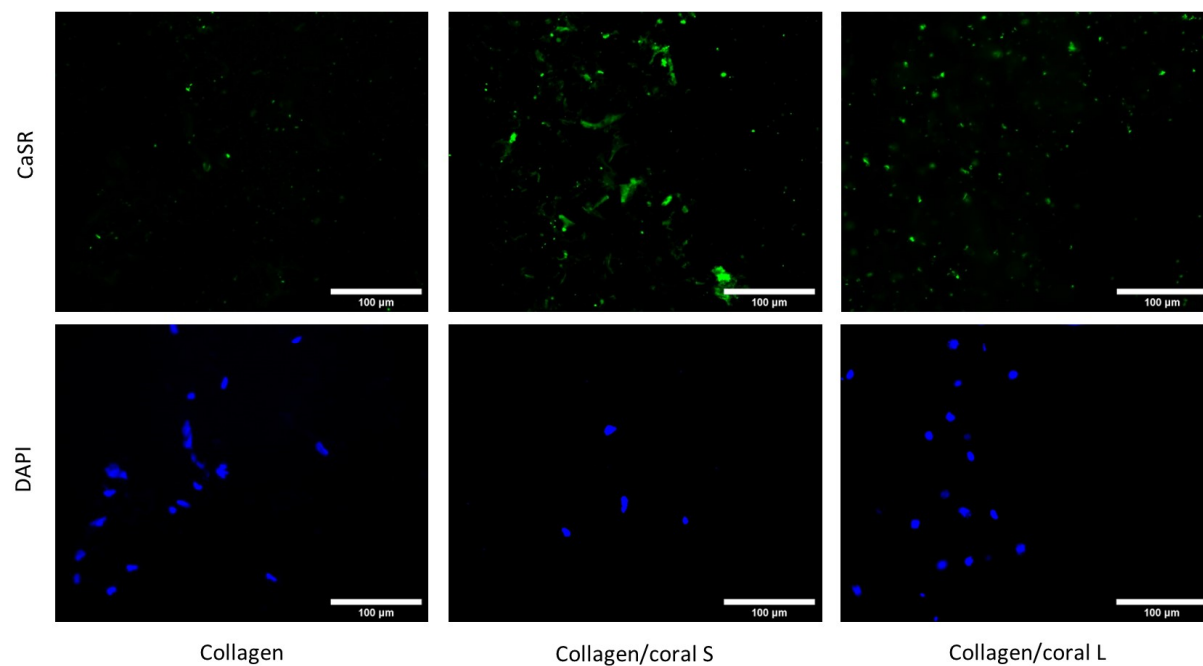

**Supplementary Figure S3.** Indirect immunofluorescent staining for CaSR in MSC-seeded scaffolds at day 28. Green channel (top row) represents CaSR staining. Blue channel (bottom row) represents DAPI staining. Magnification – 20x. Images are representative of n=3 scaffolds per group. Data represents 1 donor.
